# 1 Two-color super-resolution localization 2 microscopy via joint encoding of emitter 3 location and color

4 YUJIE WANG,<sup>1</sup> WEIBING KUANG,<sup>1</sup> MINGTAO SHANG,<sup>1</sup> AND ZHEN-LI  
5 HUANG<sup>2,\*</sup>

6 <sup>1</sup>*Britton Chance Center and MoE Key Laboratory for Biomedical Photonics, School of Engineering  
7 Sciences, Wuhan National Laboratory for Optoelectronics-Huazhong University of Science and  
8 Technology, Wuhan 430074, China*

9 <sup>2</sup>*Key Laboratory of Biomedical Engineering of Hainan Province, School of Biomedical Engineering,  
10 Hainan University, Haikou 570228, China*

11 *\*huang2020@hainanu.edu.cn*

12 **Abstract:** Multi-color super-resolution localization microscopy (SRLM) provides great  
13 opportunities for studying the structural and functional details of biological samples.  
14 However, current multi-color SRLM methods either suffer from medium to high crosstalk, or  
15 require a dedicated optical system and a complicated image analysis procedure. To address  
16 these problems, here we propose a completely different method to realize multi-color SRLM.  
17 This method is built upon a customized RGBW camera with a repeated pattern of filtered  
18 (Red, Green, Blue and Near-infrared) and unfiltered (White) pixels. With a new insight that  
19 RGBW camera is advantageous for color recognition instead of color reproduction, we  
20 developed a joint encoding scheme of emitter location and color. By combing this RGBW  
21 camera with the joint encoding scheme and a simple optical set-up, we demonstrated two-  
22 color SRLM with ~20 nm resolution and < 2% crosstalk (which is comparable to the best  
23 reported values). This study significantly reduces the complexity of two-color SRLM (and  
24 potentially multi-color SRLM), and thus offers good opportunities for general biomedical  
25 research laboratories to use multi-color SRLM, which is currently mastered only by well-  
26 trained researchers.

27 © 2021 Optical Society of America under the terms of the [OSA Open Access Publishing Agreement](#)

## 28 1. Introduction

29 Multi-color super-resolution localization microscopy (SRLM) brings rich insights into the  
30 spatial relations and fundamental interactions among subcellular structures, which are  
31 beneficial for solving important questions in life sciences [1-3]. Generally, multi-color SRLM  
32 requires to label biological targets using emitters with distinct emission colors, where the  
33 ultimate goal is to distinguish these emitters with minimal crosstalk [4]. The reported methods  
34 for achieving this goal rely on different strategies, including mainly sequential excitation [5,  
35 6], spectral splitting [7, 8], chromatic dispersion [4, 9], and point spread function (PSF)  
36 engineering [10, 11]. Sequential excitation methods sequentially capture different emitters,  
37 and distinguish these emitters from temporal image series. Spectral splitting methods capture  
38 different emitters simultaneously, use filters to split their emissions into several pathways,  
39 and finally recognize the emission colors using images from different cameras or different  
40 regions of the same camera. These methods usually suffer from medium to high crosstalk  
41 among different types of emitters, and thus can only distinguish emitters with large spectral  
42 separation [4-8].

43 Alternatively, fluorescence emission can also be dispersed into a set of adjacent pixels  
44 using a diffraction grating or prism [4, 9], and the color of the emitter is determined later  
45 through the degree of dispersion. This chromatic dispersion based multi-color SRLM method  
46 is suitable for distinguishing emitters with low crosstalk, even for those emitters with close

47 spectral separation. However, this method usually requires a dedicated optical system  
48 (consisting of dichroic mirror, mirrors, fluorescence filters, and even multiple objectives) [6,  
49 12] and a complicated image analysis procedure [4, 12], because image registration is  
50 required to align different types of emitters. On the other hand, PSF engineering [10, 11]  
51 includes emitter color into PSF with a phase modulation device, and requires only one  
52 detection pathway. This one-pathway method simplifies the optical set-up and image analysis  
53 procedure, but can only distinguish spectrally well-separated emitters with relatively high  
54 crosstalk.

55 Considering the limitations of current methods, we tried to find a simple and efficient  
56 method to realize multi-color SRLM. In this method, we aimed to reduce significantly the  
57 complexity in optical setup and image analysis, but still keep the desirable performance of  
58 low crosstalk to a level that is comparable to the best reported values [4, 5, 8]. In this way, we  
59 could promote more biomedical research laboratories to focus on challenging questions (e.g.  
60 particle tracking [13], relative distribution of cellular structures [14], and molecular counting  
61 [15]) that can be best investigated using multi-color SRLM. Fortunately, we noticed that a  
62 special type of scientific Complementary Metal-Oxide-semiconductor (sCMOS) camera,  
63 called RGBW camera [16, 17], may be used to achieve this goal. Note that RGBW camera  
64 typically contains filtered (or color) pixels and unfiltered (or white, W) pixels, and that color  
65 pixels includes mainly red (R), green (G), blue (B), and near infrared (NIR) pixels. RGBW  
66 camera was originally designed to perform color reproduction for low light photography, but  
67 is not successful in the consumer market. However, instead of color reproduction, we may use  
68 the color pixels to recognize emitter colors, and the white pixels to identify emitter location  
69 (for SRLM). Since the emission from an emitter covers a good number of color pixels  
70 (depending on the PSF size, typically  $>10$ ), the emitter color may be well captured and later  
71 recognized from dissecting the relationships among these color pixels, thus enabling low  
72 crosstalk in classifying different types of emitters. That is to say, exploring the potentials of  
73 RGBW camera in color recognition rather than color reproduction may bring new  
74 possibilities in various application fields of multi-color SRLM.

75 Here we present a simple method for two-color (and potentially multi-color) SRLM via  
76 joint encoding of emitter location and color. To the best of our knowledge, the optical setup  
77 of our method is the simplest as compared to the reported two-color SRLM methods [4-11].  
78 We designed a pixel-level scheme for joint encoding emitter location and color by taking  
79 advantage of the repeated pixel pattern (containing R, G, B, NIR, and W pixels) in a  
80 customized RGBW camera. Notably, this kind of customized camera is different from  
81 traditional monochrome (black-and-white) and color cameras, and the color pixels are used  
82 here for color recognition rather than color representation. Therefore, we prefer to rename it  
83 to colorimetry camera. Using this camera, we are able to encode both emitter location and  
84 color into a single raw image. Furthermore, by replacing a monochrome camera (which is  
85 traditionally used in multi-color SRLM) with this colorimetry camera and choosing multiple  
86 emitters which could be recognized by this camera, we would possibly perform multi-color  
87 SRLM through a simple optical set-up. As a pilot study, here we demonstrated the power and  
88 usage of this colorimetry camera in two-color SRLM with low crosstalk. Imaging with more  
89 colors is possible if we select more types of emitters, since the color pixels response to a  
90 broad spectral range.

## 91 **2. Material and Methods**

### 92 *2.1 Sample preparation*

93 Cos-7 cells were cultivated on 35-mm glass-bottom dishes. After overnight growth, samples  
94 were washed with PBS at room temperature and soaked with fixation buffer (3%  
95 paraformaldehyde, 0.05% glutaraldehyde and 0.2% Triton X-100 in PBS) for 15 minutes.  
96 After washed three times with PBS, cells were permeabilized and soaked with blocking buffer  
97 (3% BSA and 0.2% Triton X-100 in PBS) for 30 min. Cells were further stained with primary

98 and secondary antibody successively at room temperature for 1 hour, washed three times with  
 99 blocking buffer, washed with PBS, and then stored at 4 °C for further use. The primary  
 100 antibodies were mouse monoclonal anti- $\alpha$ -tubulin antibody (T5168, Sigma), or/and rabbit  
 101 anti-Tom20 antibody (HPA011562, Sigma). The secondary antibodies were DL633 labeled  
 102 Goat anti-Mouse IgG (A-21235, Invitrogen) or/and CF680 labeled donkey anti-rabbit IgG  
 103 (20820, Biotium).

## 104 2.2 Optical setup and imaging

105 Cell samples were soaked in standard SRLM buffer [18], and then imaged on a home-built  
 106 SRLM system (Fig. 1(a)) based on an Olympus IX73 microscope. Cells were excited by a  
 107 640 nm laser (3W, LWRL640, Laserwave, China). Fluorescence emission was collected by a  
 108 60X/NA1.42 oil immersion objective (Olympus), transmitted through a dichroic mirror  
 109 (ZT405/488/532/640rpc-XT, Chroma), focused by the tube lens, and then filtered with a  
 110 band-pass filter (ET705/100m, Chroma). The filtered emission was finally captured by a  
 111 customized RGBW camera (Retina 200DSC, Tucsen Photonics. Pixel size: 6.5  $\mu$ m. Read  
 112 noise: 2.71 e- rms) with an exposure time of 30 ms. The emission from different emitters  
 113 (Fig. 1(d)) was imaged through the optical system in Fig. 1(a), captured by the color pixels  
 114 (R, G, B, NIR pixels) and unfiltered pixels (W pixels) in the camera. The repeated pixel  
 115 pattern of the camera is shown in Fig. 1(b). Emitter locations (see the dots in Fig. 1(d), and  
 116 the crosses in Fig. 1(e)) can be encoded with W pixels, using PSF of the emitters. Emitter  
 117 color can also be encoded into the same raw image (Fig. 1(e)), using the sensitivity changes in  
 118 the color pixels under different wavelengths (Fig. 1(c)).

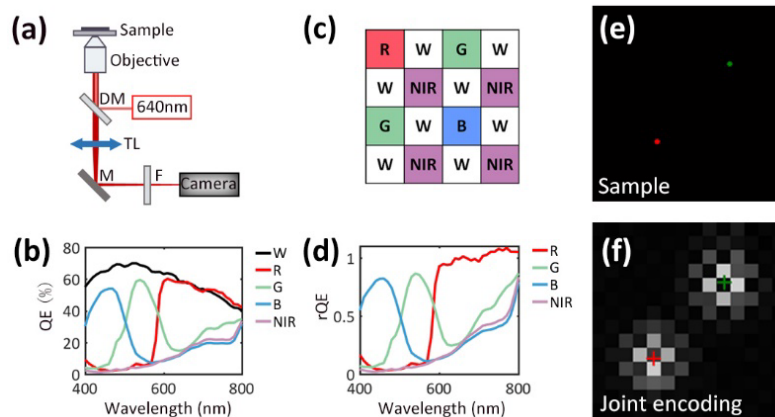

119 **Fig. 1.** Schematic of multi-color SRLM via joint encoding of emitter location and color. (a) Optical set-up.  
 120 DM: dichroic mirror; TL: tube lens; M: mirror; F: filter. (b) The spectral sensitivity curves of the W channel  
 121 and the color channels in the colorimetry camera. Note that at some wavelengths, the QE values in the R  
 122 channel are higher than those in the W channel. This is possibly due to different levels of transmission  
 123 attenuation from the filling materials between the on-chip lens and the wiring. Color recognition in this  
 124 study is based on experimentally measured NCI distributions, rather than these QE curves. (c) The repeated  
 125 pixel pattern of the colorimetry camera, including four color channels (R, G, B, and NIR) and a W channel.  
 126 (d) The sensitivity changes (or relative quantum efficiency, rQE) of the color pixels under different  
 127 wavelengths, where rQE is the QE ratio between color channel and W channel:  $rQE = QE_{color}/QE_W$ . (d)  
 128 Illustration of a sample consisted of two emitters with different color. (e) Illustration of an acquired image  
 129 with joint encoding of emitter locations and color. The crosses indicate the original true positions of the  
 130 emitters.  
 131

## 132 2.3 Determining emitter location for SRLM

133 For sparse emitters in SRLM, we calculate emitter locations from joint encoded raw images  
 134 using two steps: subregion extraction and localization.

135 *Subregion extraction.* In a joint encoded raw image, the emission from an emitter is  
136 distributed in a subregion of pixels, where each pixel is associated with a channel (R, G, B,  
137 NIR, or W). The channel arrangement can be found in the repeated pixel pattern of the  
138 camera. Among these channels, we use only the W pixels to perform localization analysis.  
139 Hence, we design the following mask to extract W pixels from a raw image:

$$140 \quad \text{Mask}_{i,j} = \begin{cases} 1, & \text{if } W \\ 0, & \text{else} \end{cases}, \quad (1)$$

141 where  $i, j \in [-R, R]$ , and  $2R+1$  is equal to the subregion size.

142 To minimize the influences of noises and uneven background, we smooth the raw image  
143 with a Gaussian filter combined with the mask shown above. The filter has the following  
144 kernel:

$$145 \quad \text{Kernel}_{i,j} = \text{norm}(N_{i,j} \text{Mask}_{i,j}), \quad (2)$$

146 where  $N_{i,j}$  is Gaussian function, and norm means normalization of the sum in the subregion to  
147 1. The standard deviation of the Gaussian function depends on the PSF of the optical system,  
148 and is set to be 1.3 pixels in this study.

149 A pixel can be detected as the center pixel of an emitter, if the intensity of this pixel is  
150 larger than the predetermined threshold and this pixel has the maximum intensity in the  
151 subregion. Pixels detected as center pixel are then used to extract subregions of  $9 \times 9$  pixels  
152 from the raw image. The size of subregion is set according to the PSF of our optical system.

153 *Localization.* We apply a maximum likelihood estimator to the W pixels in the subregion to  
154 calculate emitter location. From similar procedures in the literature [19], the parameters of a  
155 molecule ( $\vec{\theta}$ ) can be determined by minimizing the following equation:

$$156 \quad \text{L1}(\vec{\theta}) = \sum_{\text{Mask}_{i,j}=1} [N_{i,j} - q_{i,j} \ln(N_{i,j})] \quad (3)$$

157 where  $N_{i,j}$  is the expected intensity,  $q_{i,j}$  is the observed intensity. In this study,  $N_{i,j}$  is set to be  
158 Gaussian distribution, where  $\vec{\theta}$  denotes the parameters that defines the Gaussian distribution,  
159 including amplitude (A), emitter location(x, y), and the standard deviation (s) which is  
160 determined by the point spread function (PSF) the optical system.

## 161 2.4 Determining emitter color for SRLM

162 For the colorimetry camera used in this study, the color of an emitter is encoded by four color  
163 channels (R, G, B, and NIR). Here we define normalized color intensity (NCI) to characterize  
164 the color of emitters detected in our imaging system. Note NCI is determined mainly by the  
165 emission spectrum of an emitter and the relative quantum efficiency curves of the camera (see  
166 Fig. 1(c)). NCI is calculated by the filtered intensity (color channels) divided by the unfiltered  
167 intensity (W channel). We calculate four NCI components (NCI\_R, NCI\_G, NCI\_B, and  
168 NCI\_NIR) to describe emitter color. Since different types of emitters have different emission  
169 spectra, the NCI components of these emitters should follow different distributions, which  
170 can be used for color recognition.

171 Single-color SRLM experiments should be performed with all involved emitter types to  
172 build their corresponding NCI distributions. Later in multi-color SRLM analysis, the emitter  
173 color can be recognized and assigned by comparing the calculated NCI components of the  
174 emitters in subregions with the NCI distributions calculated from single-color SRLM  
175 experiments.

176 *Calculating NCI components.* From the Gaussian distribution determined in the localization  
177 step, we are able to recover the expected intensity (unfiltered) in color pixels. Ideally, after  
178 extracting the observed intensity (filtered) in these color pixels, we can acquire NCI

179 components. However, after considering the effect of noise, we design a maximum likelihood  
 180 estimator to calculate the NCI components.

181 Here we use  $r$  to represent the estimated NCI component. In a subregion, we assume there  
 182 are  $K$  pixels in a color channel. For color pixel  $k$  ( $k \in [1, K]$ ), the expected unfiltered intensity  
 183 (recovered) is  $Z_k$ , the expected filtered intensity is  $rZ_k$ , and the observed filtered intensity is  
 184  $q_k$ . Consequently,  $q_k$  follows Poisson distribution with a mean of  $rZ_k$ . The joint probability  
 185 function of this color channel in the subregion follows:

$$186 \quad P(r) = \prod \frac{e^{-rZ_k} (rZ_k)^{q_k}}{q_k!}, \quad (4)$$

187 We can determine  $r$  with the maximum  $P$  by minimizing the following  $L$  function:

$$188 \quad L(r) = \sum [rZ_k - q_k \ln(rZ_k)], \quad (5)$$

189

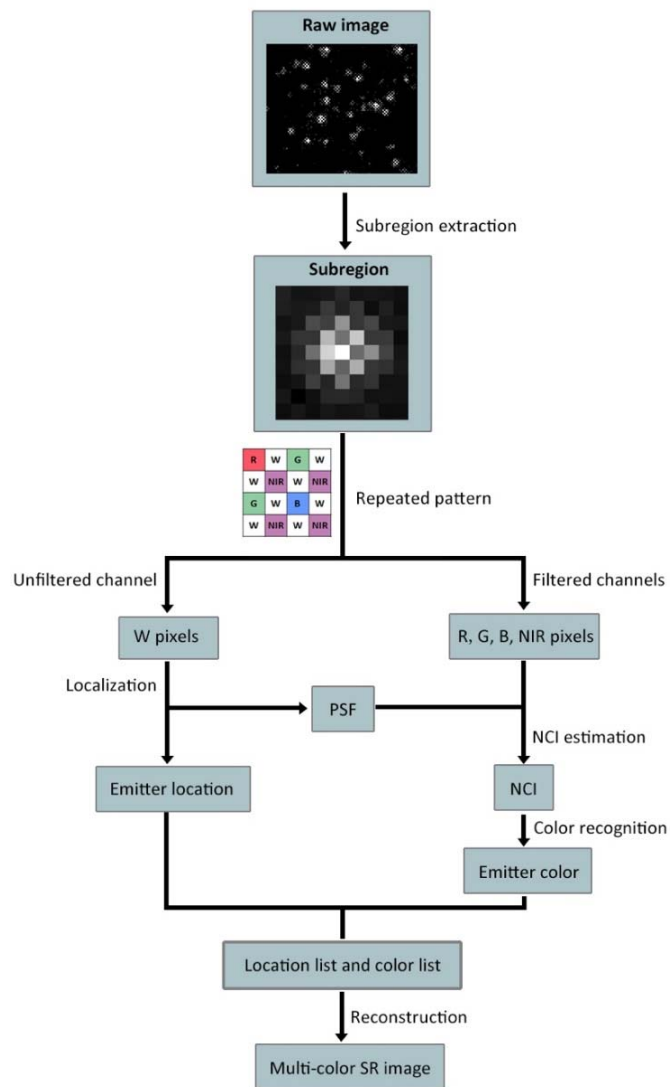

190

191 **Fig. 2.** Data analysis procedures for super-resolution localization microscopy. This scheme displays only  
 192 the procedures for one emitter in one raw image. These procedures should be repeated for all raw images to  
 193 obtain a full list of emitter location and color, which is used to reconstruct a final multi-color super-  
 194 resolution image.

195 *Building NCI distributions.* By calculating the four NCI components from the same type of  
 196 emitters, we are able to build the NCI distributions for different color channels. For each of  
 197 the involved emitter types, we conduct single-color SRLM imaging, and build the  
 198 corresponding NCI distributions.

199 *Assigning emitter color.* Considering that the four NCI components of an emitter are  
 200 independent from each other ( $r_u$  is the estimated NCI component of the  $u$ th color channel,  
 201 where  $u \in [1, U]$ ,  $U$  denotes the number of NCI components), for emitter type  $o$  ( $o \in [1, O]$ ), the  
 202 probability of one emitter arisen from a certain emitter type could be written as the product of  
 203 the possibilities (normalized NCI distributions) of different channels:

$$204 \quad \Psi(\vec{r}, o) = \prod_{u=1}^U PDF(r_u, o), \quad (6)$$

205 By normalizing and maximizing the probability above, we are able to determine the emitter  
 206 color in a subregion.

## 207 2.5 Theoretical prediction of localization precision

208 Following the procedures by Thompson et al [20], here we derive an equation for predicting  
 209 localization precision from the colorimetry camera. Although the  $W$  pixels for encoding  
 210 emitter location cover only 50% of the pixels in a subregion, the intensity of a  $W$  pixel  
 211 situated on position  $(i, j)$  still follows Gaussian distribution:

$$212 \quad N_{ij}(\vec{\theta}) = A e^{-\frac{(i-x)^2 + (j-y)^2}{2s^2}}, \quad (7)$$

213 where  $\vec{\theta}$  is a group of parameters that defines the Gaussian distribution, including amplitude  
 214 ( $A$ ), emitter location ( $x, y$ ), and the standard deviation ( $s$ ) which is determined by the point  
 215 spread function (PSF) the optical system.

216 Estimating emitter location equals to minimizing the following sum of squared errors:

$$217 \quad \chi^2(\vec{\theta}) = \sum_{Mask_{ij}=1} \frac{[q_{ij} - N_{ij}(\vec{\theta})]^2}{\sigma_{ij}^2}, \quad (8)$$

218 where  $q_{ij}$  is the observed emission intensity in pixel  $(i, j)$ ,  $N_{ij}$  is the expected emission  
 219 intensity in pixel  $(i, j)$ , and  $\sigma_{ij}$  is the uncertainty of  $N_{ij}$ . Using Taylor expansion, we can write  
 220 the mean squared error of  $\theta_m$  as:

$$221 \quad \langle (\Delta\theta_m)^2 \rangle = \frac{1}{\sum_{Mask_{ij}=1} \left( \frac{\partial N_{ij}^2}{\partial \theta_m} / \sigma_{ij}^2 \right)}, \quad (9)$$

222 For the uncertainty brought by shot noise from the emitter:

$$223 \quad \sigma_{ij}^2 = N_{ij}, \quad (10)$$

224 Hence, we obtain the localization error in one dimension ( $\Delta x$ ) from shot noise by rewriting  
 225 Eq. 9:

$$226 \quad \langle (\Delta x)^2 \rangle = \frac{1}{\pi A}, \quad (11)$$



227 For the uncertainty induced by background,  $\sigma_{ij}^2 = b$ , where  $b$  is the mean intensity of  
 228 background, we calculate  $\Delta x$  from background as:

$$229 \quad \langle (\Delta x)^2 \rangle = \frac{4b}{\pi A^2}, \quad (12)$$

230 After considering detected signal, background, and pixelation noise, the localization precision  
 231 in one dimension can be written as:

$$232 \quad \langle (\Delta x)^2 \rangle = \frac{A/12 + (4b + A)s^2}{\pi s^2 A^2}, \quad (13)$$

233 Using similar procedures, we can write the precision of standard deviation ( $\Delta s$ ) and  
 234 amplitude ( $\Delta A$ ) as:

$$235 \quad \langle (\Delta s)^2 \rangle = \frac{A + 8b}{8\pi A^2}, \quad (14)$$

$$236 \quad \langle (\Delta A)^2 \rangle = \frac{A + 2b}{\pi s^2}, \quad (15)$$

### 237 2.6 Theoretical prediction of NCI estimation error

238 Here we predict NCI estimation error ( $\Delta r$ ) using the recovered unfiltered intensity ( $Z_k + b$ ),  
 239 the expected filtered intensity ( $rZ_k + r_1b$ ), and the observed filtered intensity ( $q_k$ ). Calculating  
 240 NCI estimation error equals to minimizing the following sum of squared errors [20]:

$$241 \quad \chi_{(r)}^2 = \sum_k \frac{(rZ_k + r_1b - q_k)^2}{\sigma_k^2}, \quad (16)$$

$$242 \quad \langle (\Delta r)^2 \rangle = \frac{1}{\sum_k (Z_k^2 / \sigma_k^2)} \quad (17)$$

243 The intensity uncertainty of pixel  $k$  is from shot noise, localization error, and read noise:

$$244 \quad \sigma_k^2 = rZ_k + r_1b + r^2 \langle (\Delta Z_k)^2 \rangle + n^2, \quad (18)$$

245 where  $n$  is the standard deviation of read noise,  $\Delta Z_k$  is the intensity fluctuation brought by  
 246 localization error.

$$247 \quad \langle (\Delta Z_k)^2 \rangle = \sum_m \left( \frac{\partial Z_k}{\partial \theta_m} \right)^2 \langle (\Delta \theta_m)^2 \rangle, \quad (19)$$

248 Substituting Eqs. 13-15 into Eq. 17, we can write NCI estimation error ( $\Delta r$ ) as:

$$249 \quad \langle (\Delta r)^2 \rangle = \frac{1}{\sum_k \frac{Z_k^2}{rZ_k + r_1b + r^2 \sum_m \left( \frac{\partial Z_k}{\partial \theta_m} \right)^2 \langle (\Delta \theta_m)^2 \rangle + n^2}}, \quad (20)$$

### 250 2.7 The procedures for determining emitter location and color

251 We employed SRLM as a representative application, and developed analysis procedures  
 252 (Fig. 2) to decode emitter location and color from raw images. Taking a subregion  
 253 containing only one emitter as an example, we firstly extract the  $W$  pixels from this

254 subregion, and then use maximum likelihood estimator to calculate the emitter location.  
255 We further extract the color pixels from the same subregion, and estimate the normalized  
256 color intensity (NCI) of the emitter using the color pixels and the recovered Gaussian  
257 distribution from the emitter (see Section 2.3-2.4). Using the NCI values in four channels,  
258 we calculate the probability for identifying the color of the emitter. After repeating these  
259 decoding procedures (Fig. 2) in all acquired raw images, we obtain the locations and colors  
260 of a large number of emitters, and finally use them to reconstruct a two-color super-  
261 resolution (SR) image.

### 262 **3. Results**

#### 263 *3.1 Determining emitter localization and color using simulated images*

264 To quantify the performance of the colorimetry camera (Retina 200DSC, Tucsen Photonics)  
265 in estimating emitter location and color, we simulated raw images with a size of  $64 \times 64$   
266 pixels. For simplicity, we placed only one emitter in a single raw image. We quantified NCI  
267 estimation error and localization precision from a series of 1, 000 images in the following  
268 conditions: emission wavelength (400 - 700 nm), signal level (4,000 - 20,000  
269 photon/molecule, typical for DL633 and CF680 in our experimental conditions due to the  
270 long exposure time), and readout noise (2.71 e- rms, measured for the colorimetry camera).  
271 We controlled the background level (336.4 photon/pixel), PSF standard deviation (1.34  
272 pixel), and pixel size (108.3 nm) to match our SRLM experimental conditions. Because  
273 emitters can be centered on 16 different positions (see Fig. 1(b)), we also quantified NCI  
274 estimation error on these positions. We compared the localization precision of the colorimetry  
275 camera with Hamamatsu Flash 4.0 V3 (a popular monochrome camera used in SRLM). For  
276 the Flash 4.0 V3, readout noise is 1.6 e- rms, and QE is 0.78 in 660 nm.

277 We used simulated dataset to evaluate the estimation errors in emitter location and NCI.  
278 Note that 50% of the pixels in the colorimetry camera are W pixels, and the rest 50% are  
279 color pixels. Since the W pixels in a monochrome camera takes up all the pixels, the  
280 colorimetry camera suffers from a certain level of degradation in localization precision. We  
281 compared the localization precision of the colorimetry camera with a popular commercial low  
282 light camera (Hamamatsu Flash 4.0 V3), and found that the localization precision of the  
283 colorimetry camera (Eq. 13) is about  $\sqrt{2}$  times that of the Flash 4.0 V3 (Fig. 3(a)). For the far-  
284 red emitters (DL633, CF680) used in this study, simulation shows that the localization  
285 precision is 4 nm for the Flash 4.0 V3, and 6 nm for the colorimetry camera. Furthermore, we  
286 confirmed that the central positions of the emitter in different kind of color pixels have  
287 negligible effect on the localization precision (Fig. 3(b)). We also investigated the  
288 relationship between the NCI estimation error and various photophysical parameters (signal  
289 level, position) (Fig. 3(c-d)). We found that the NCI estimation error basically follows the  
290 theoretical model (Section 2.6, Eq. 20), and that the central position of the emitter have  
291 negligible effect on NCI estimation.

#### 292 *3.2 Single-color SRLM*

293 We verified the performance of our method using single-color SRLM on fixed cos-7 cells.  
294 Two representative SR images and the corresponding enlarged images are shown in Fig. 4(a-  
295 d), where microtubules were immunostained with DL633 (Fig. 4(a-b)) or mitochondria with  
296 CF680 (Fig. 4(c-d)). From a cross-sectional profile analysis, we obtained a maximum FWHM  
297 (full width at half maximum) resolution of 53.5 nm for the microtubule (see Fig. 4(e), the  
298 smaller value in the left), which is similar as the reported results [5]. Similar to the previously  
299 reported methods [4, 5], we used point-like objects in a SR image to calculate the image  
300 resolution inside cell sample. The localization precision from the colorimetry camera was  
301 experimentally measured to be 9-12 nm for these two emitters (see Fig. 5(a-c) for DL633, and  
302 Fig. 5(d-f) for CF680), which is sufficient to support SR imaging with ~20 nm resolution.



303 Given the fact that the cross-correlation drift correction method used in this study has a  
 304 precision of 5-10 nm [21], the experimental precision of 9-12 nm is consistent with the  
 305 theoretical precision of 6 nm in Section 3.1. We obtained a FWHM resolution of 21.0 nm (see  
 306 Fig. 5(e),  $\text{FWHM} = 2.35\sigma$ ) using the distribution of 4,136 localizations in 253 point-like  
 307 objects. This FWHM resolution is close to the previously reported results [4, 5]. We assigned  
 308 the color of each emitter to either DL633 or CF680 using the normalized probability  
 309 distribution shown in Fig. 4(f). We also evaluated the misidentification between DL633 and  
 310 CF680, and found that the crosstalk between DL633 and CF680 was  $< 2\%$  (Fig. 4(g)),  
 311 comparable to the lowest reported values in the literatures [4, 8].

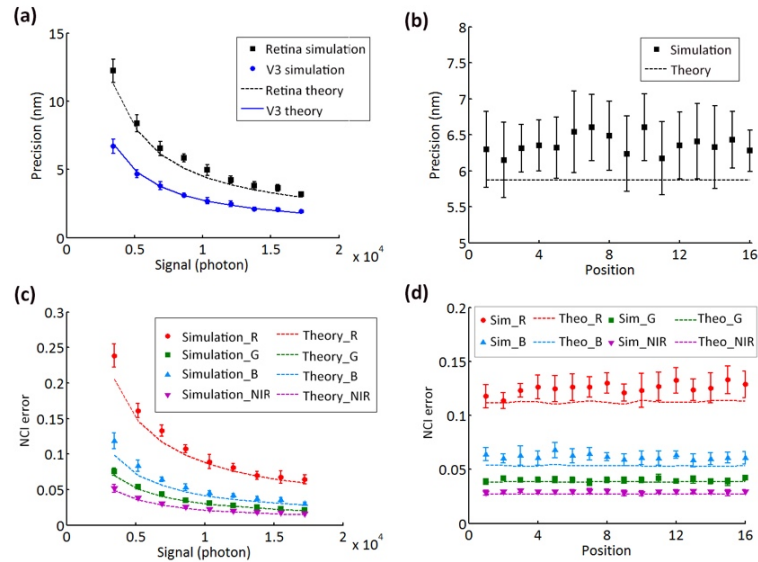

312 **Fig. 3.** Performance of determining location and color on simulated dataset. (a) Localization precision under  
 313 different signal intensities. (b) Localization precision for emitter situated on different pixel positions. (c)  
 314 NCI estimation error under different signal intensities. (d) NCI estimation error for emitter situated on  
 315 different pixel positions. Note that there are 16 different positions for a  $4 \times 4$  pattern in the colorimetry  
 316 camera, and that the positions shown in (b) and (d) point out the center locations of emitters. Error bars  
 317 were from ten repeated measurements. The wavelength was 660 nm. Results for other wavelengths are  
 318 similar.  
 319

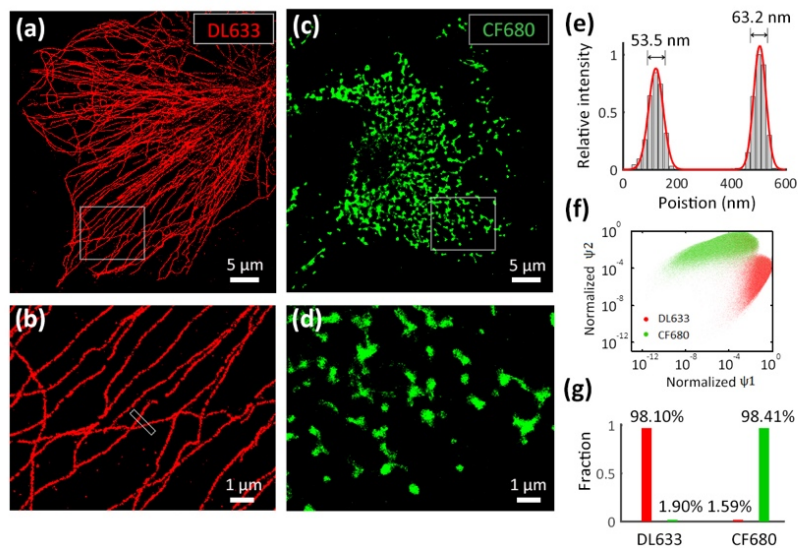

320

321  
322  
323  
324  
325  
326  
327  
328  
329

**Fig. 4.** Single-color SRLM imaging. (a) SR image of microtubules in a fixed cos-7 cell labeled with DL633. (b) Zoom-in images of the rectangular areas in (a). (c) SR image of mitochondria in a fixed cos-7 cell labeled with CF680. (d) Zoom-in images of the rectangular areas in (c). (e) Cross-sectional profile of the boxed area in (b). The histograms (gray bars) were fitted with two Gaussian functions (red line). The FWHM resolution is shown on the top of the histograms. (f) Scatter plot of the normalized probability of an emitter arisen from a certain emitter type in SRLM. Here logarithmic scale is used. The plot is from 10,000 experimental localizations detected in single color (DL633 or CF680) raw images. (g) Crosstalk between DL633 and CF680 (< 2%). Red bars represent the proportion of emitters that were identified as DL633. Green bars represent the proportion of emitters that were identified as CF680.

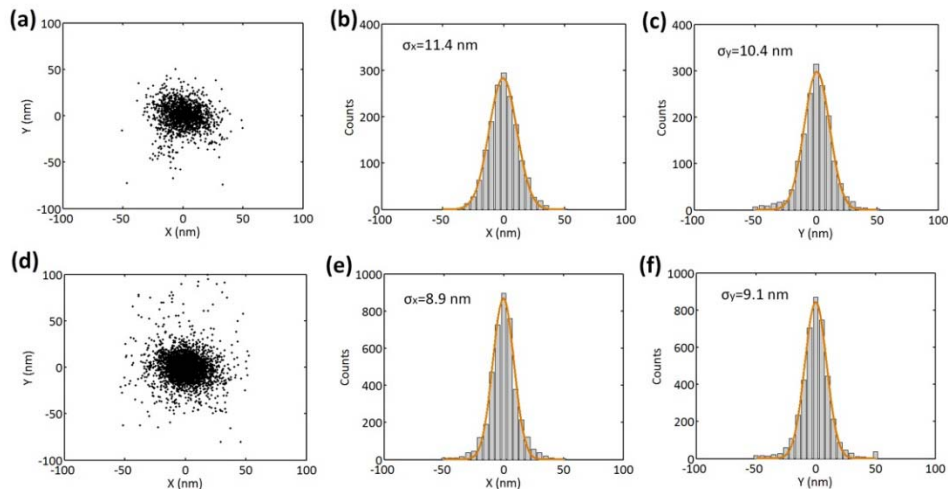

330  
331  
332  
333  
334  
335  
336  
337  
338

**Fig. 5.** Localization distribution of point-like objects in DL633 and CF680 dataset. (a) Localization distribution of point-like objects in DL633 dataset. (b) The histogram of x dimension in (a). (c) The histogram of y dimension in (a). (d) Localization distribution of point-like objects in CF680 dataset. (e) The histogram of x dimension in (d). (f) The histogram of y dimension in (d). Clusters with > 9 emitters were aligned according to their center positions. The data were the same as those in Fig. 4. The distributions in (a) were from 1,651 emitters in 99 clusters. The distributions in (d) were from 4,136 localizations in 253 clusters. The FWHM resolution values are 26.8 nm (b), 24.5 nm (c), 21.0 nm (e) and 21.4 nm (f), respectively.

339

### 3.3 Two-color SRLM

340  
341  
342  
343  
344  
345  
346  
347  
348  
349  
350

We carried out two-color SRLM on fixed cos-7 cells labeled simultaneously with DL633 (microtubules) and CF680 (mitochondria). We show a representative SR image and two enlarged images in Fig. 6(a-c). We analyzed the cross-sectional profiles of two microtubules and found an FWHM resolution of 54.7 nm and 60.6 nm (Fig. 6(d-e)), respectively. Additionally, in our method, the minimum distance between emitters is found to be 9 pixels, which is the subregion size covered by one emitter. Therefore, for the reported multi-color methods with low crosstalk (< 2%), the minimum separation distance in our method is the same as that in salvaged fluorescence based method [8], but is significantly shorter than that in the chromatic dispersion based methods (~20 pixel) [4, 9]. This finding indicates that our method allows high emitter density in raw images, thus enabling good potential in high-throughput multi-color SRLM.

351

## 4. Discussion

352  
353  
354  
355  
356

We proposed a new method for two-color super-resolution localization microscopy. By taking advantage of the repeated pixel pattern of a customized RGBW camera (called colorimetry camera in this study), we are able to realize joint encoding of emitter location and color in a single raw image. We demonstrated that two-color SRLM is possible by combining a colorimetry camera and a basic optical set-up. We further verified that our method is capable

357 of providing both low crosstalk ( $< 2\%$ ) and high image resolution ( $\sim 20$  nm), which are  
358 comparable to the best reported values.

359 The major disadvantages of our method is from two sources: (1) the current colorimetry  
360 camera has a moderate quantum efficiency ( $< 70\%$  for the white pixels and  $< 60\%$  for the  
361 color pixels), limiting the image quality and thus the localization precision and the spectral  
362 discrimination ability; (2) only the white pixels (which occupy 50% of all pixels) are used for  
363 molecule localization, resulting in under-sampling and decreased localization precision. The  
364 limitation in quantum efficiency may be partially overcome by developing back-illuminated  
365 colorimetry cameras. And the localization precision issue can be minimized by developing  
366 new algorithms which use all pixels for molecule localization.

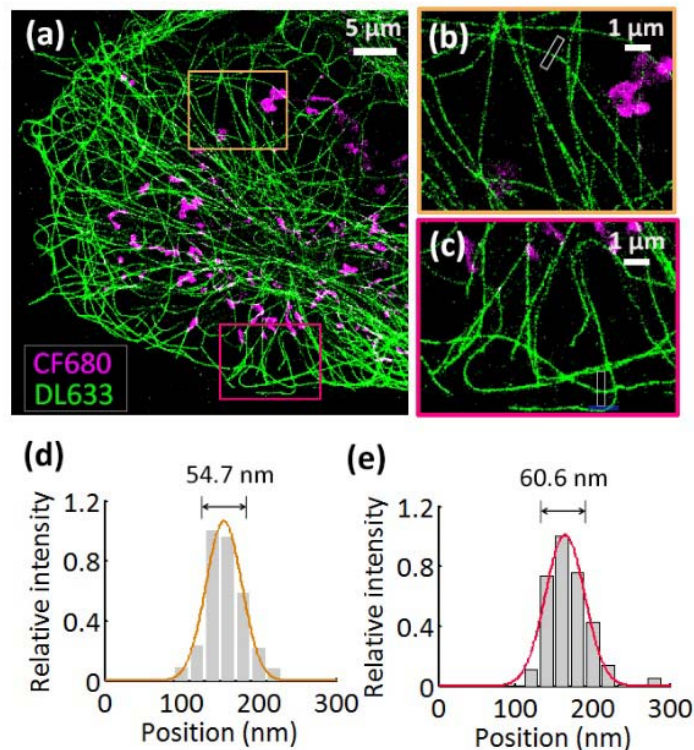

367  
368 **Fig. 6** Simultaneous two-color SRLM. (a) A reconstructed SR image of a fixed cos-7 cell labeled with  
369 DL633 (microtubules) and CF680 (mitochondria), respectively. (b-c) Zoom-in images of the rectangular  
370 areas in (a). (d-e) Cross-sectional profiles of the boxed areas in (b-c). The histograms (gray bars) were fitted  
371 with Gaussian function (orange and red lines). The FWHM resolution is shown on the top of the histograms.  
372

373 It is worthy to note that here we only demonstrated 2D SRLM with the colorimetry camera;  
374 however, in principle, our method can be expanded to 3D SRLM if we make appropriate  
375 modification in optical set-up (for example, including a cylindrical lens in the detection path).  
376 And, with the selection of appropriate emitters, our method may be able to realize  
377 simultaneous SRLM with 3~6 colors. Due to the limited spectral discrimination ability of our  
378 method ( $\sim 40$  nm), a possible way to achieve 3-6 color SRLM is to screen emitters which have  
379 (1) well-separated emission; (2) good photophysical properties for SRLM; (3) low  
380 fluorescence background from simultaneous excitation of multiple lasers.

381 In summary, we demonstrated simultaneous two-color SRLM imaging using two common  
382 emitters (DL633 and CF680, with 40 nm separation in emission maximum) and achieved a  
383 low crosstalk of  $< 2\%$ . In comparison, the PSF engineering based method, which is the only  
384 reported method for simultaneous multi-color SRLM, was able to discriminate two emitters

385 with ~100 nm emission separation and ~20% crosstalk. Compared with the chromatic  
386 dispersion based methods (which are capable of distinguishing four emitters with ~10 nm  
387 emission separation and < 2% crosstalk, but require an elongated PSF), our method is poorer  
388 in the spectral discrimination ability, but has the desirable performance of low crosstalk, and  
389 allows a larger activation density (via no elongated PSF). After considering the simplicity of  
390 our method (uses a basic optical set-up and requires no image registration), we believe this  
391 study will encourage a popular use of multi-color SRLM in biomedical researches, and  
392 stimulate a rising interest in the development of new sCMOS cameras for multi-color imaging  
393 at low light condition.

394 **Funding.** National Natural Science Foundation of China (81827901), China Postdoctoral Science Foundation  
395 (2020M682418), Fundamental Research Funds for the Central Universities (2018KFYXKJC039), Director Fund of  
396 WNLO and Start-up Fund from Hainan University (KYQD(ZR)-20077).

397 **Acknowledgments.** We thank the Optical Bioimaging Core Facility of WNLO-HUST for technical support, and  
398 Tucsen Photonics for customizing the sCMOS camera.

399 **Disclosures.** Chinese patent (No. 201911365462.2).

400 **Data availability.** Data underlying the results presented in this paper are not publicly available at this time but  
401 may be obtained from the authors upon reasonable request.

## 402 References

- 403 1. Y. M. Sigal, R. Zhou, and X. Zhuang, "Visualizing and discovering cellular structures with super-resolution  
404 microscopy," *Science* **361**, 880-887 (2018).
- 405 2. S. J. Sahl, S. W. Hell, and S. Jakobs, "Fluorescence nanoscopy in cell biology," *Nat. Rev. Mol. Cell Biol.* **18**,  
406 685-701 (2017).
- 407 3. P. A. Gómez-García, E. T. Garbacik, J. J. Otterstrom, M. F. Garcia-Parajo, and M. Lakadamyali, "Excitation-  
408 multiplexed multicolor superresolution imaging with fm-STORM and fm-DNA-PAINT," *Proc. Natl Acad. Sci.*  
409 *USA* **115**, 12991-12996 (2018).
- 410 4. Z. Zhang, S. J. Kenny, M. Hauser, W. Li, and K. Xu, "Ultrahigh-throughput single-molecule spectroscopy and  
411 spectrally resolved super-resolution microscopy," *Nat. Methods* **12**, 935-938 (2015).
- 412 5. M. Bates, B. Huang, G. T. Dempsey, and X. Zhuang, "Multicolor super-resolution imaging with photo-  
413 switchable fluorescent probes. *Science* **317**, 1749-1753 (2007).
- 414 6. G. T. Dempsey, J. C. Vaughan, K. H. Chen, M. Bates, and X. Zhuang, "Evaluation of fluorophores for optimal  
415 performance in localization-based super-resolution imaging," *Nat. Methods* **8**, 1027-1036 (2011).
- 416 7. I. Testa, C. A. Wurm, R. Medda, E. Rothermel, C. Von Middendorf, J. Fölling, S. Jakobs, A. Schönle, S. W.  
417 Hell, and C. Eggeling, "Multicolor fluorescence nanoscopy in fixed and living cells by exciting conventional  
418 fluorophores with a single wavelength," *Biophys. J.* **99**, 2686-2694 (2010).
- 419 8. Y. Zhang, L. K. Schroeder, M. D. Lessard, P. Kidd, J. Chung, Y. Song, L. Benedetti, Y. Li, J. Ries, J. B.  
420 Grimm, L. D. Lavis, P. D. Camilli, J. E. Rothman, D. Baddeley, and J. Bewersdorf, "Nanoscale subcellular  
421 architecture revealed by multicolor three-dimensional salvaged fluorescence imaging," *Nat. Methods* **17**, 225-  
422 231 (2020).
- 423 9. B. Dong, L. Almassalha, B. E. Urban, T. Q. Nguyen, S. Khuon, T. L. Chew, V. Backman, C. Sun, and H. F.  
424 Zhang, "Super-resolution spectroscopic microscopy via photon localization," *Nat. Commun.* **7**, 12290 (2016).
- 425 10. Y. Shechtman, L. E. Weiss, A. S. Backer, M. Y. Lee, and W. E. Moerner, "Multicolour localization microscopy  
426 by point-spread-function engineering," *Nat. Photonics* **10**, 590-594 (2016).
- 427 11. E. Hershko, L. E. Weiss, T. Michaeli, and Y. Shechtman, "Multicolor localization microscopy and point-  
428 spread-function engineering by deep learning," *Opt. Express* **27**, 6158-6183 (2019).
- 429 12. K. S. Grubmayer, S. Geissbuehler, A. Descloux, T. Lukes, M. Leutenegger, A. Radenovic, and T. Lasser,  
430 "Spectral cross-cumulants for multicolor super-resolved SOFI imaging," *Nat. Commun.* **11**, 3023 (2020).
- 431 13. A. von Diezmann, Y. Shechtman, and W. E. Moerner, "Three-dimensional localization of single molecules for  
432 super-resolution imaging and single-particle tracking," *Chem. Rev.* **117**, 7244-7275 (2017).
- 433 14. T. Rahbek-Clemmensen, M. D. Lycas, S. Erlendsson, J. Eriksen, M. Apuschkin, F. Vilhardt, T. N. Jørgensen, F.  
434 H. Hansen, and U. Gether, "Super-resolution microscopy reveals functional organization of dopamine  
435 transporters into cholesterol and neuronal activity-dependent nanodomains," *Nat. Commun.* **8**, 740 (2017).
- 436 15. Y. Zhang, M. Lara-Tejero, J. Bewersdorf, and J. E. Galán, "Visualization and characterization of individual  
437 type III protein secretion machines in live bacteria," *Proc. Natl Acad. Sci. USA* **114**, 6098-6103 (2017).
- 438 16. R. D. Jansen van Vuuren, A. Armin, A. K. Pandey, P. L. Burn, and P. Meredith, "Organic Photodiodes: The  
439 Future of Full Color Detection and Image Sensing," *Adv. Mater.* **28**, 4766-4802 (2016).
- 440 17. W. Choi, H. Park, and C. Kyung, "Color reproduction pipeline for an RGBW color filter array sensor," *Opt.*  
441 *Express* **28**, 15678-15690 (2020).

- 442  
443  
444  
445  
446  
447  
448  
449  
450  
451  
452
18. S. Van De Linde, A. Löschberger, T. Klein, M. Heidbreder, S. Wolter, M. Heilemann, and M. Sauer, "Direct stochastic optical reconstruction microscopy with standard fluorescent probes," *Nat. Protoc.* **6**, 991–1009 (2011).
  19. T. W. Quan, P. Li, F. Long, S. Zeng, Q. Luo, P. N. Hedde, G. U. Nienhaus, and Z. L. Huang, "Ultra-fast, high-precision image analysis for localization-based super resolution microscopy," *Opt. Express* **18**, 11867–11876 (2010).
  20. R. E. Thompson, D. R. Larson, and W. W. Webb, "Precise Nanometer Localization Analysis for Individual Fluorescent Probes," *Biophys. J.* **82**, 2775–2783 (2002).
  21. Y. Wang, J. Schnitzbauer, Z. Hu, X. Li, Y. Cheng, Z. L. Huang, and B. Huang, "Localization events-based sample drift correction for localization microscopy with redundant cross-correlation algorithm," *Opt. Express* **22**, 15982-15991 (2014).
